# Supplementary material
Source: PubMed Central journal article supplement (PMC5825874)
Supplement: develop-145-154500-s1.pdf [file develop-145-154500-s1.pdf]

## Supplemental Tables

**Table S1. The list of primers and Taqman probes used in PCR and genotyping.**

| Name                        | Sequence                | Experiment                    |
|-----------------------------|-------------------------|-------------------------------|
| ccdc39-F primer             | CAGTGGGAGAACACCATTGAG   | qRT-PCR and Sanger sequencing |
| ccdc39-R primer             | TCTTGCTTCCTGCTTTATTCGTG | qRT-PCR and Sanger sequencing |
| b-actin-F primer            | GGCTGTATTCCCCTCCATCG    | qRT-PCR and Sanger sequencing |
| b-actin-R primer            | CCAGTTGGTAACAATGCCATGT  | qRT-PCR and Sanger sequencing |
| ccdc39-Ex10R primer         | CTATGCCCAATTGAACCTCC    | Sanger sequencing             |
| ccdc39-Ex8R primer          | CCTCAGAGCTTGTAAGTCAC    | Sanger sequencing             |
| prh-ccdc39 F primer         | GTCACGAAGGCAACAGAAGTC   | TaqMan SNP Genotyping assay   |
| prh-ccdc39 R primer         | GCCACTGAGCTTCTGTGTGA    | TaqMan SNP Genotyping assay   |
| prh-ccdc39 wt probe         | AAGGATGAGGTGTGTAC       | TaqMan SNP Genotyping assay   |
| prh-ccdc39 prh mutant probe | AGGATGAGGAGTGTAC        | TaqMan SNP Genotyping assay   |

**Table S2. The list of antibodies used in immunofluorescence and western blotting**

| Name                                     | Host   | Dilution | Manufactured                                       | ID                 | Usage                      |
|------------------------------------------|--------|----------|----------------------------------------------------|--------------------|----------------------------|
| Acetylated $\alpha$ -tubulin             | Mouse  | 1:1,000  | Sigma                                              | T7451              | IHC with antigen retrieval |
| Arl13B                                   | Rabbit | 1:500    | Proteintech                                        | 1711-1-AP          | IHC with antigen retrieval |
| beta-tubulin                             | Mouse  | 1:1,000  | Sigma                                              | T8660              | Western blotting           |
| Ccdc39                                   | Rabbit | 1:1,000  | Sigma                                              | HPA035364 (A60704) | IHC, Western blotting      |
| Dnali1                                   | Rabbit | 1:200    | Proteintech                                        | 17601-1-AP         | IHC                        |
| gamma-tubulin                            | Mouse  | 1:500    | Sigma                                              | T6557              | IHC                        |
| Gas8                                     | Rabbit | 1:200    | Gift from Dr. Mary Porter, University of Minnesota |                    | IHC                        |
| GFAP                                     | Rabbit | 1:1,000  | Sigma                                              | G9296              | Western blotting           |
| MBP                                      | Rabbit | 1:1,000  | Sigma                                              | ab40390            | Western blotting           |
| anti-rabbit IgG-Alexa 488                | Donkey | 1:1,000  | Thermo Fisher Scientific                           | A-21206            | IHC                        |
| anti-rabbit IgG-Alexa 568                | Donkey | 1:1,000  | Thermo Fisher Scientific                           | A10042             | IHC                        |
| anti-mouse IgG-Alexa 488                 | Donkey | 1:1,000  | Thermo Fisher Scientific                           | A-21202            | IHC                        |
| anti-mouse IgG-Alexa 568                 | Donkey | 1:1,000  | Thermo Fisher Scientific                           | A10037             | IHC                        |
| IRDye <sup>®</sup> 680RD anti-Rabbit IgG | Goat   | 1:10,000 | Licor                                              | 925-68071          | Western blotting           |
| IRDye <sup>®</sup> 680RD anti-Mouse IgG  | Goat   | 1:10,000 | Licor                                              | 925-68071          | Western blotting           |

## Supplemental Movies

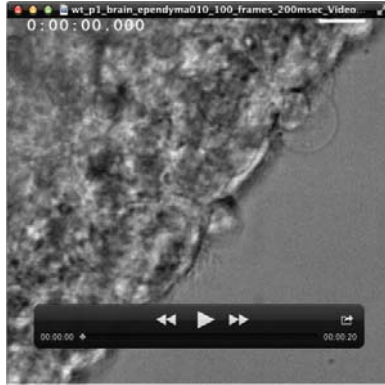

### Movie 1: *Ex-vivo* video-microscopy recording of the P1 wild-type forebrain medial wall ependymal cilia.

P1 ependymal cilia in the *Ccdc39*<sup>wt/wt</sup> medial wall of the forebrain are motile and display normal beating pattern (video captured at a rate of 400 frames per second and played back at a rate of 5 frames per second), scale bar is 10  $\mu$ m.

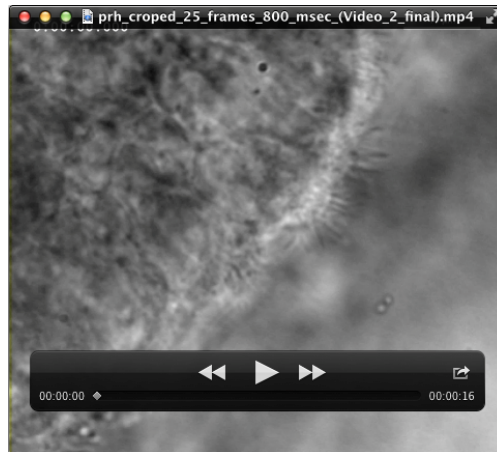

### Movie 2: *Ex-vivo* video-microscopy recording of the P1 *Ccdc39*<sup>prh/prh</sup> forebrain medial wall ependymal cilia.

P1 *Ccdc39*<sup>prh/prh</sup> ependymal cilia of the medial forebrain wall are immotile and show rigid cilia beating patterns (video captured at a rate of 100 frames per second and played back at a rate of 5 frames per second), scale bar is 10  $\mu$ m.

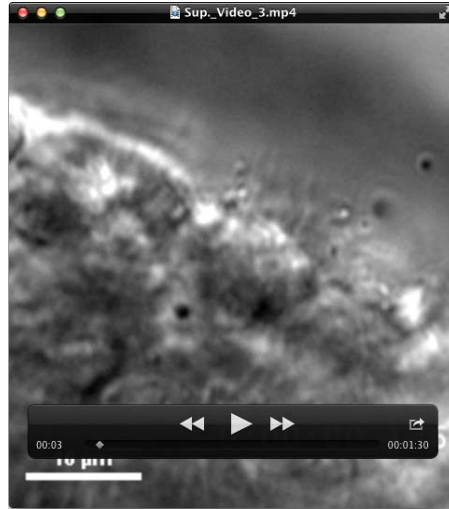

**Movie 3: Ex-vivo video-microscopy recording of the wild-type forebrain medial wall ependymal cilia.**

P6 ependymal motile cilia in medial wall of the forebrain displaying normal beating pattern, frequency, and cilia beating patterns (video captured at a rate of 100 frames per second and played back at 5 frames per second). Scale bar is 10  $\mu\text{m}$ .

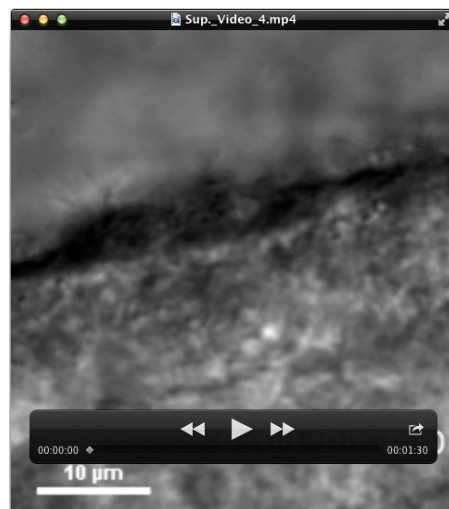

**Movie 4: Ex-vivo video-microscopy recording of the *Ccdc39<sup>prh/prh</sup>* forebrain medial wall ependymal cilia.**

P6 *Ccdc39<sup>prh/prh</sup>* ependymal motile cilia in medial wall of the forebrain showing slower beat frequency and a rigid cilia beating patterns (video captured at a rate of 100 frames per second and played back at 5 frames per second) than the wild-type cilia. Scale bar is 10  $\mu\text{m}$ .

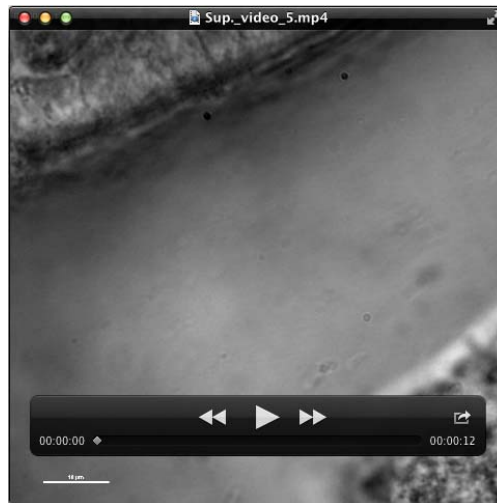

**Movie 5: Ex-vivo video-microscopy recording of ependymal cilia-generated CSF flow in the central aqueduct of a wild-type mouse.**

P7 ependymal motile cilia in the central aqueduct generating vigorous unidirectional CSF fluid flow (video captured at a rate of 10.4 frames per second and played back at 5 frames per second) in wild-type mouse. Scale bar is 10  $\mu\text{m}$ .

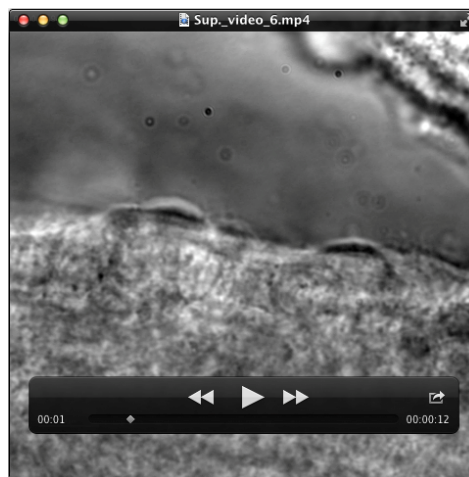

**Movie 6: Ex-vivo video-microscopy recording of ependymal cilia-generated CSF flow in the central aqueduct of a *Ccdc39<sup>prh/prh</sup>* mouse.**

The P7 ependymal cilia of the *Ccdc39<sup>prh/prh</sup>* central aqueduct showing rigid axoneme and are unable to generate CSF fluid flow (video captured at a rate of 10.4 frames per second and played back at 5 frames per second). Scale bar is 10  $\mu\text{m}$ .

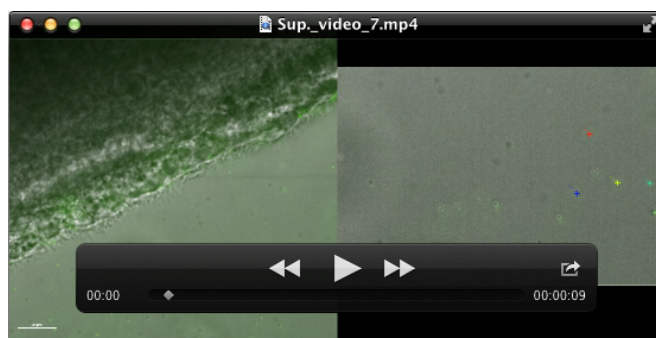

**Movie 7: Ex-vivo video-microscopy tracing of fluorescent micro-beads in the wild-type mouse forebrain.**

The original video of an *ex-vivo* brain slice with addition of fluorescent micro-beads in the P7 *Ccdc39*<sup>wt/wt</sup> forebrain ventricle (left). The enlarged and cropped video analyzed in NIS Element software (right). Tracking of the fluorescent micro-beads in the wild-type brain showed that the beads flowed quickly in one direction and exit the field of view very rapidly (video captured at rate of 41 frames per second were played back at a rate of 5 frames per second). Average flow speed was  $68 \pm 0.7 \mu\text{m}/\text{sec}$ . Scale bar is  $20 \mu\text{m}$ .

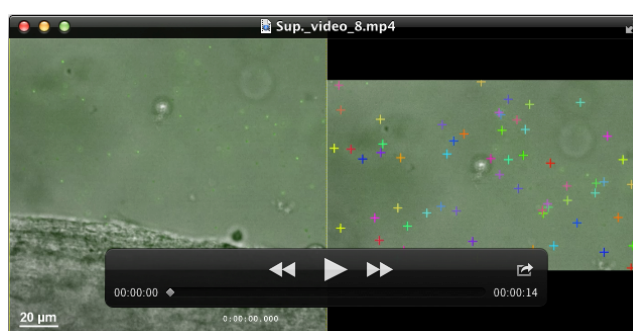

**Movie 8: Ex-vivo video-microscopy tracing of fluorescent micro-beads in the *Ccdc39*<sup>prh/prh</sup> mutant forebrain.**

The original video of an *ex-vivo* brain slice with addition of fluorescent micro-beads in the P7 *Ccdc39*<sup>prh/prh</sup> forebrain ventricle (left). The enlarged and cropped video analyzed in NIS Element software (right). Tracking of the fluorescent micro-beads in the *Ccdc39*<sup>prh/prh</sup> animals, the beads flowed very slowly in a multiple directions and can be detected in the field of view during the video recording (video captured at rate of 41 frames per second and were played back at a rate of 5 frames per second). Average flow speed was  $11 \pm 0.07 \mu\text{m}/\text{sec}$ . Scale bar is  $20 \mu\text{m}$ .

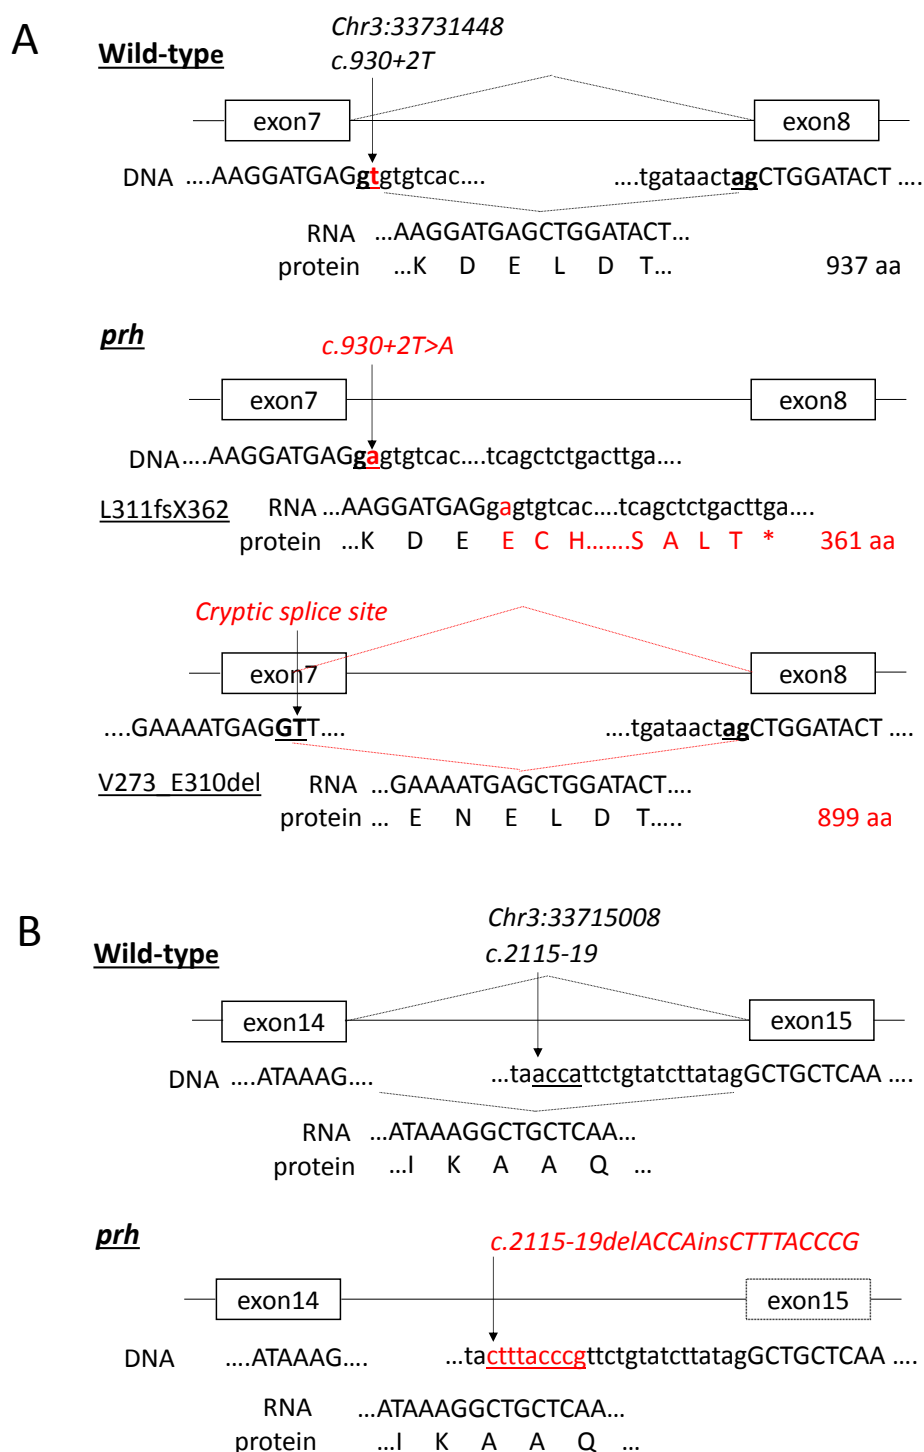

**Supplemental Figure 1. Homozygous nucleotide sequence alterations found in the *prh* mutant.**

- (A) *Ccdc39*<sup>c.930+2T>A</sup> (g.chr3:33731488A>T) resulted in expression of two mRNA variants which encode Ccdc39L311fsX362, due to failure in mRNA splicing between exon 7 and exon 8, and Ccdc39V273\_E310del due to cryptic splicing in the middle of exon 7, respectively. Neither of mutant proteins were stable and were not detected in western blotting.
- (B) *Ccdc39*<sup>c.2115-19delACCAinsCTTTACCCG</sup> (g.33715005\_8delinsCGGGTAAAG) did not affect the splicing between exon 14 and exon 15.

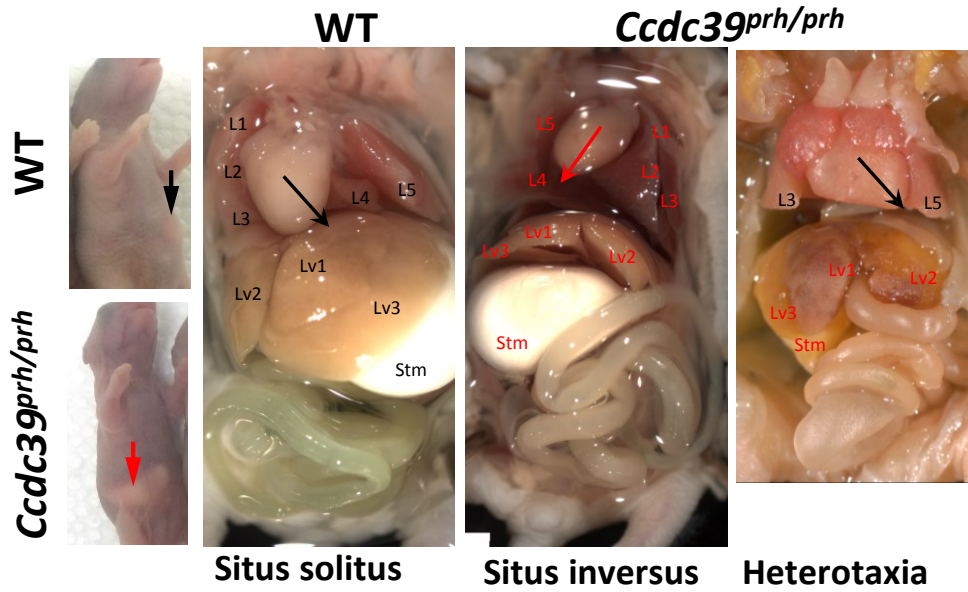

**Supplemental Figure 2. The randomization of the left-right body asymmetry in the *Ccdc39<sup>prh/prh</sup>* mutant mice.**

The right-sided stomach (identified by the milk spot) (5/15), situs inversus (3/15), and heterotaxia (2/15) were found in 15 mutants tested at P4. Dextrocardia was found in the mutants with situs inversus phenotypes (3/3).



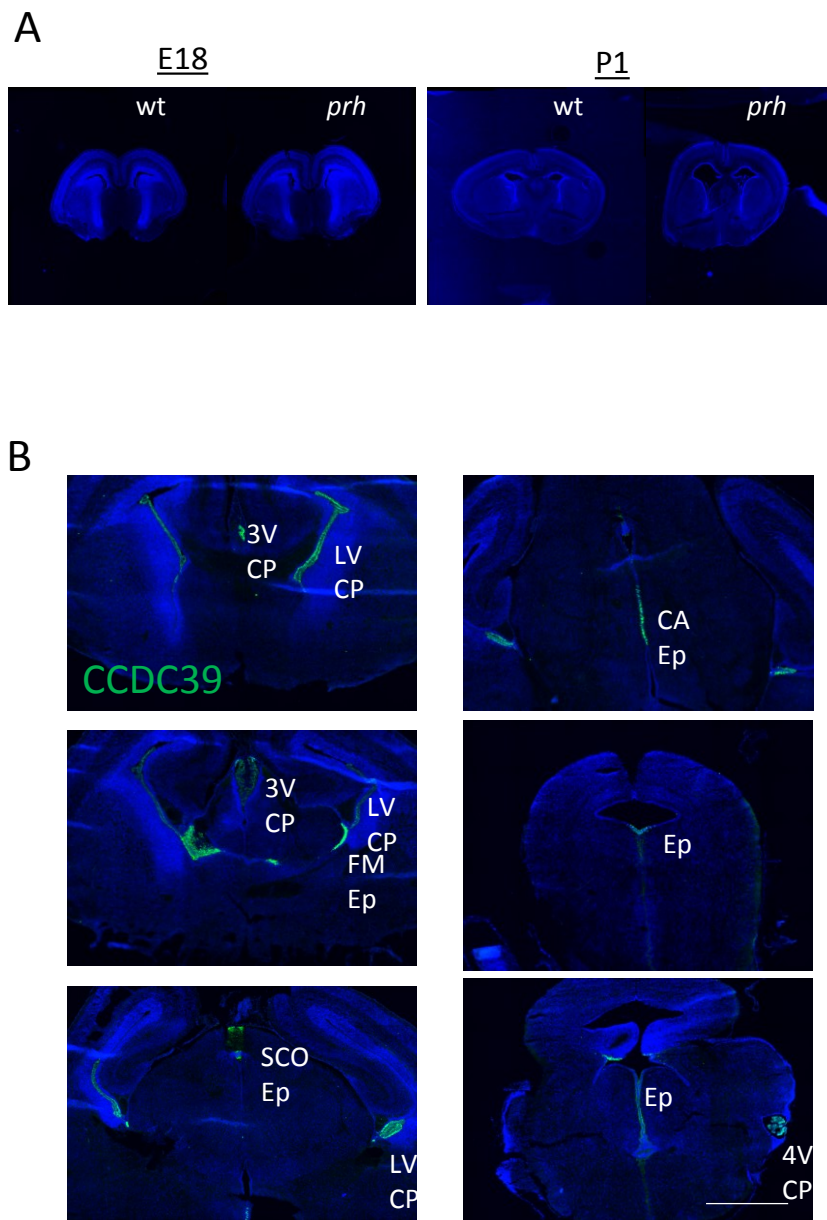

**Supplemental Figure 3. Immunohistochemistry using CCDC39 antibody and brain histology of the *prh* mutant.**

(A) Coronal brain sections of E18 and P1 *prh* mice and littermate controls. Ventriculomegaly was seen in P1 *prh* mice but not in E18.

(B) Immunohistochemistry using CCDC39 antibody expression in E18 mouse brain. CCDC39 is expressed in choroid plexus (CP) in lateral (LV), third (3V), and fourth (4V) ventricles, subcommissural organ (SCO), and ependymal (Ep) cells in ventromedial walls of the foramen of Monroe, and the central aqueduct.

Scale bar, 1 mm

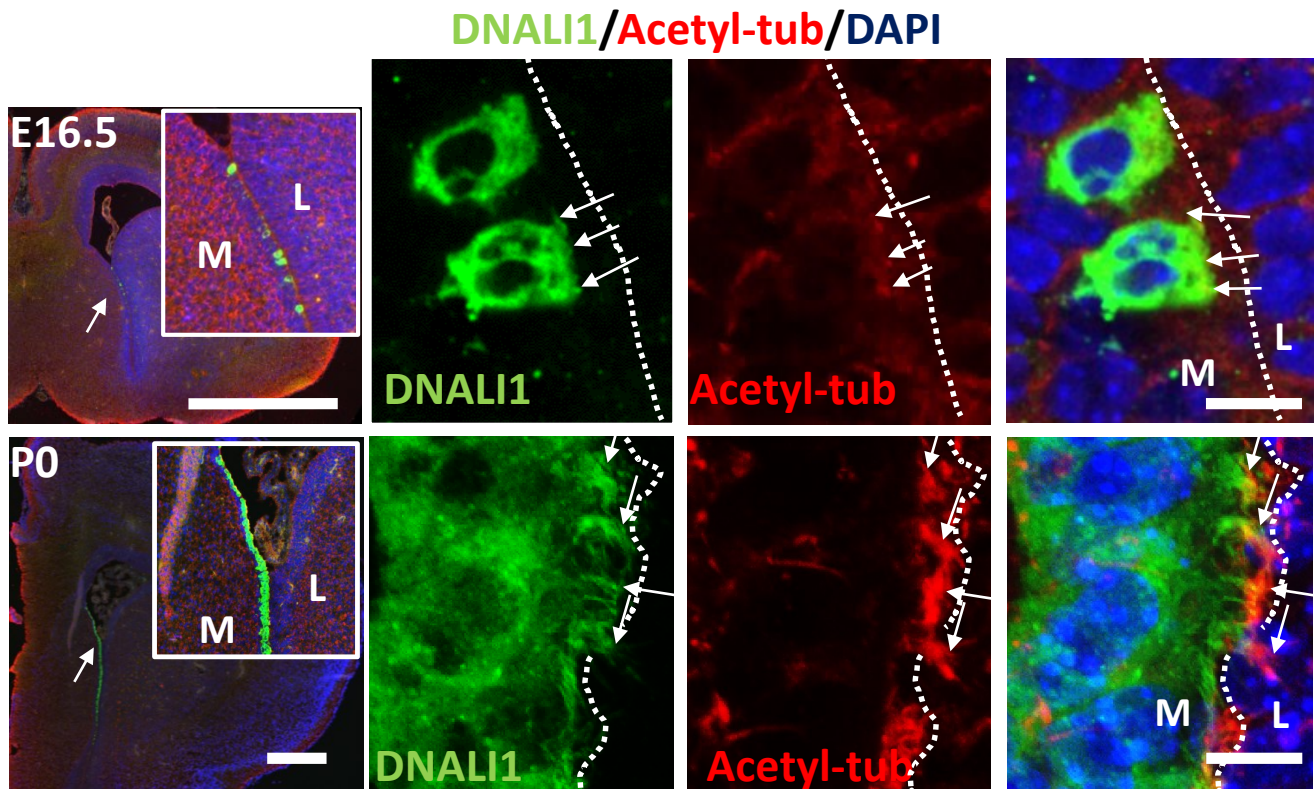

**Supplemental Figure 4. Expression of DNALI1 and acetylated tubulin in the developing ependymal cells.**

At E16, cytoplasmic expression of DNALI1 was found in fractions of ependymal cells on the medial side of the forebrain ventricles (top). Acetylated tubulin-positive cilia (white arrows) are just about to extend from their apical surface. At P0, most of the ependymal cells express DNALI1 in both cytoplasm and acetylated tubulin-positive cilia (white arrows) (bottom). Scale bars 1mm (left), and 10  $\mu$ m (right)

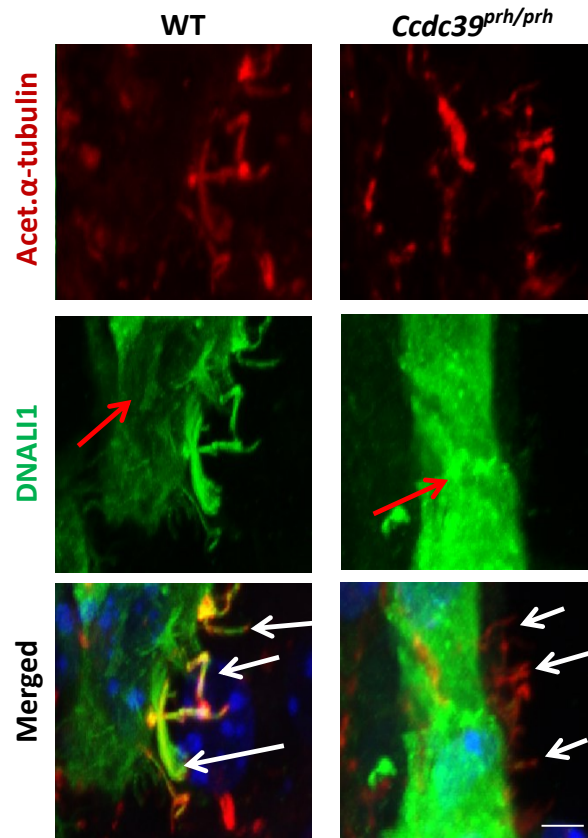

**Supplemental Figure 5. *Ccdc39* regulates DNALI1 expression and is essential for targeting the inner dynein arm protein to ependymal cilia.**

Immunofluorescent confocal images of ependymal cells stained with DNALI1 (green) and acetylated  $\alpha$ -tubulin (red) antibodies in P9 wild-type and *Ccdc39<sup>prh/prh</sup>* forebrain. DNALI1 was not detected in the axoneme of the *Ccdc39<sup>prh/prh</sup>* mutant ependymal cilia (white arrow). Note the abnormal cytoplasmic accumulation of DNALI1 in the *Ccdc39<sup>prh/prh</sup>* mutant cells. (Scale bar 10  $\mu$ m).

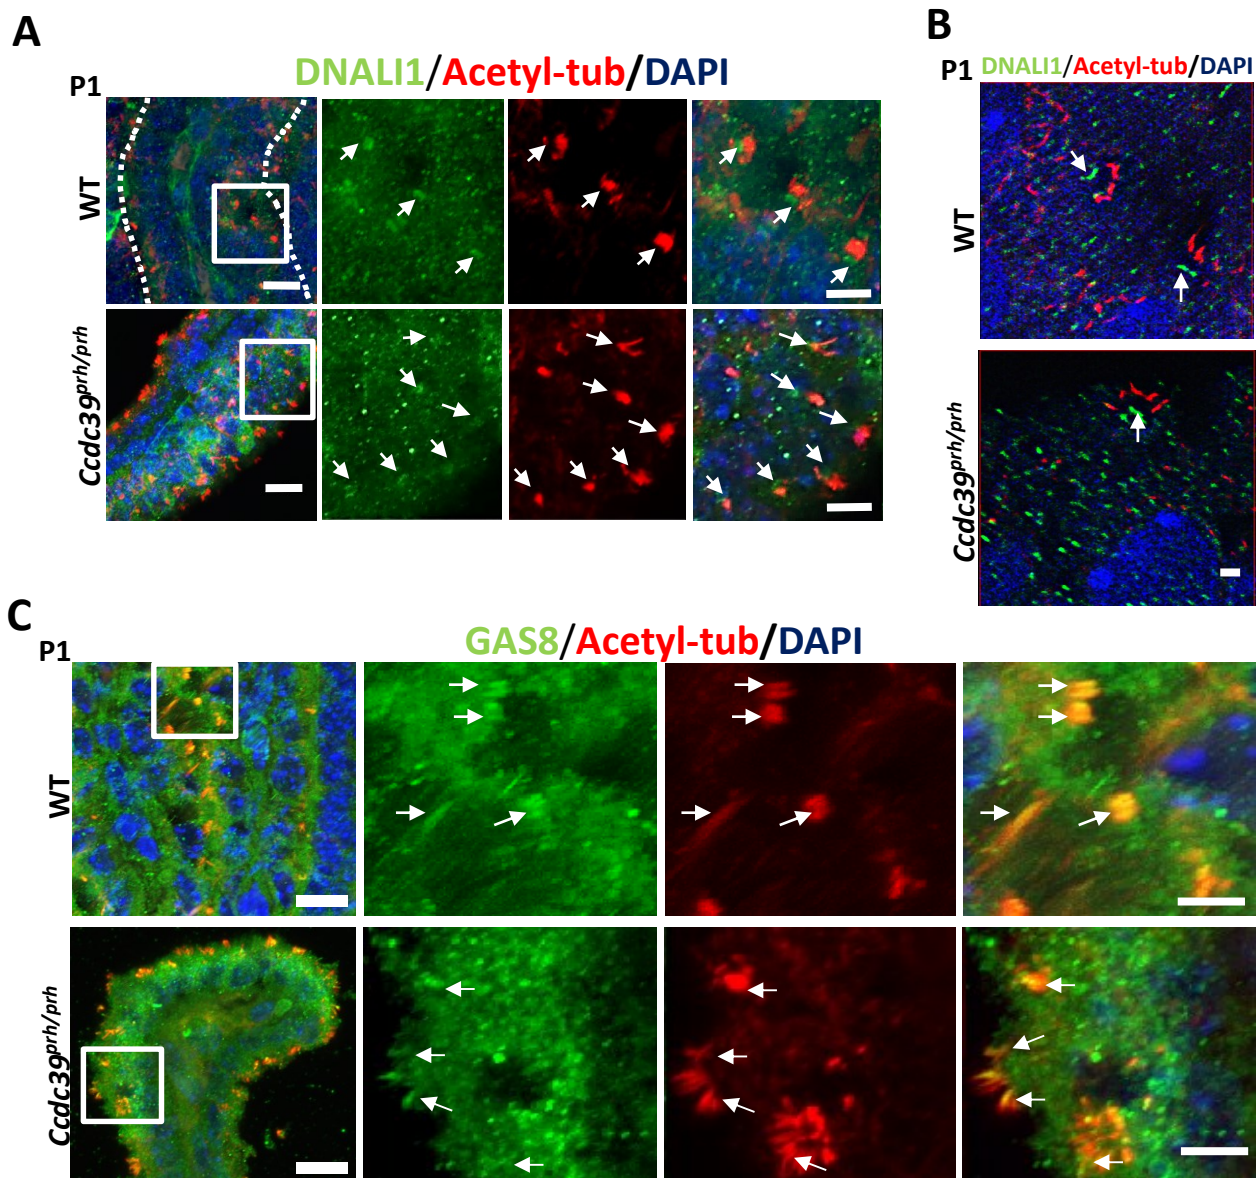

**Supplemental Figure 6. Expression patterns of motile cilia markers DNALI1 and GAS8 are maintained in the *Ccdc39<sup>prh/prh</sup>* mutant.**

- (A) Immunofluorescent confocal images of choroid plexus cells in the P1 mouse brain stained with DNALI1 (green) and acetylated tubulin (red) antibodies.
- (B) SRRF images of the choroid plexus cilia stained with DNALI1 (green) and acetylated tubulin (red) in P1 wild-type and *Ccdc39<sup>prh/prh</sup>* brains. Note that DNALI1 localizes at the base of cilia in both wild-type and the mutant choroid plexus cilia (white arrows).
- (C) Immunofluorescent confocal images of choroid plexus cells in the P1 mouse brain stained with GAS8 (green) and acetylated tubulin (red) antibodies. GAS8 localizes within the axoneme of both wild-type and the mutant choroid plexus cilia (white arrows).
- Scale bars, 10  $\mu$ m (A and C, left), 5  $\mu$ m (A and C, right), and 1  $\mu$ m (B).

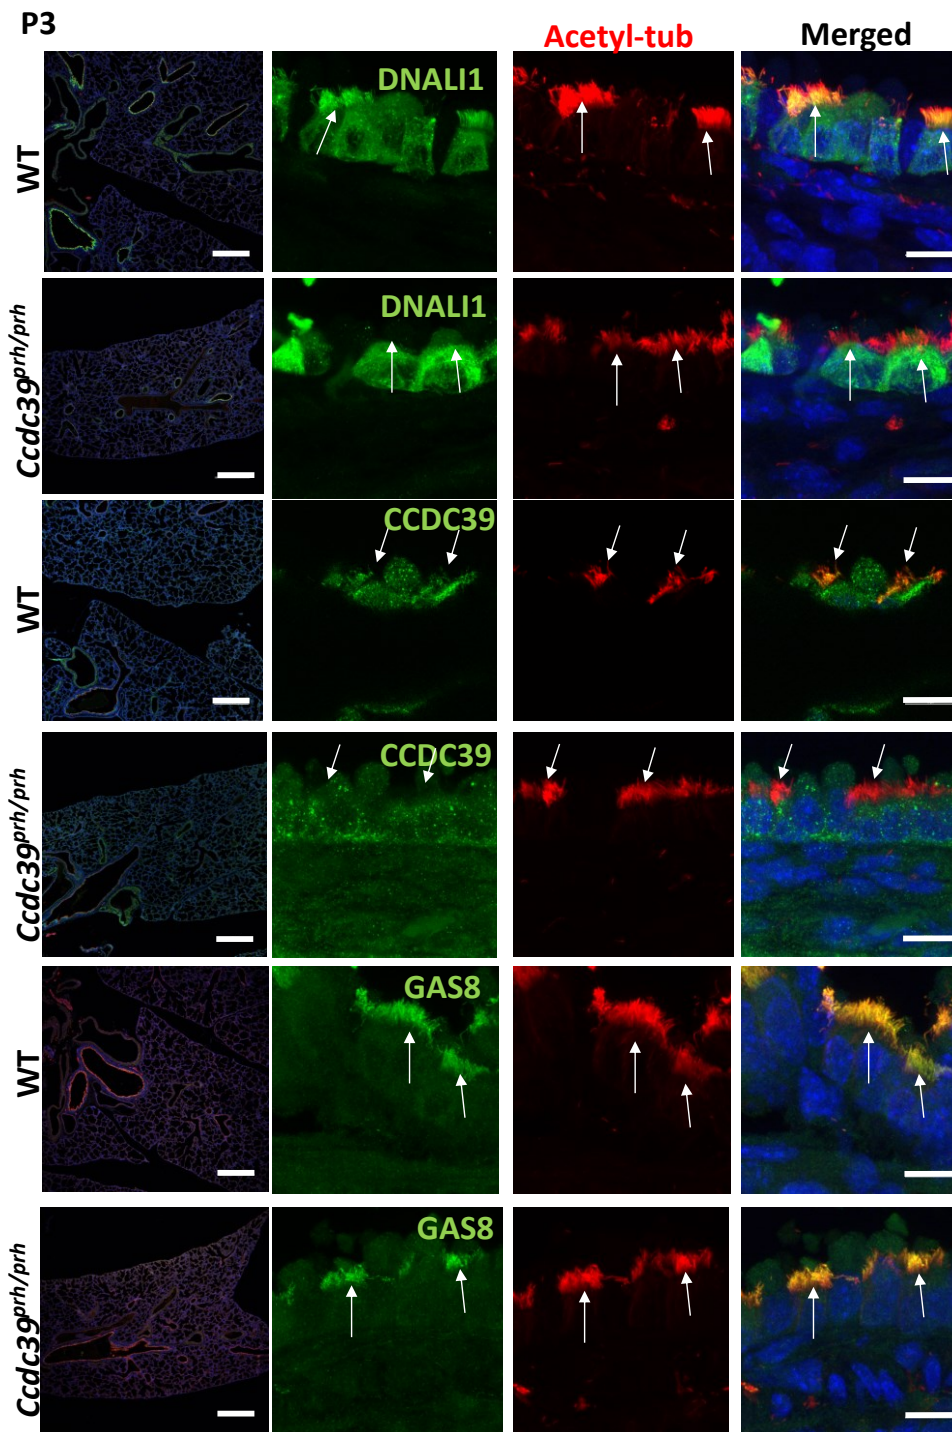

**Supplemental Figure 7. *Ccdc39* is localized within the axoneme and is essential for targeting DNALI1 in the airway cilia.**

Immunofluorescent confocal images of airway cilia stained with DNALI1, CCDC39, or GAS8 (green) with acetylated  $\alpha$ -tubulin (red) antibodies in P3 wild-type and *Ccdc39<sup>prh/prh</sup>* the lung. DNALI1 was not detected in the axoneme of the *Ccdc39<sup>prh/prh</sup>* mutant bronchial cilia (white arrow). Note the mutation did not affect GAS8 (Scale bars; left 500  $\mu$ m, right 10  $\mu$ m).

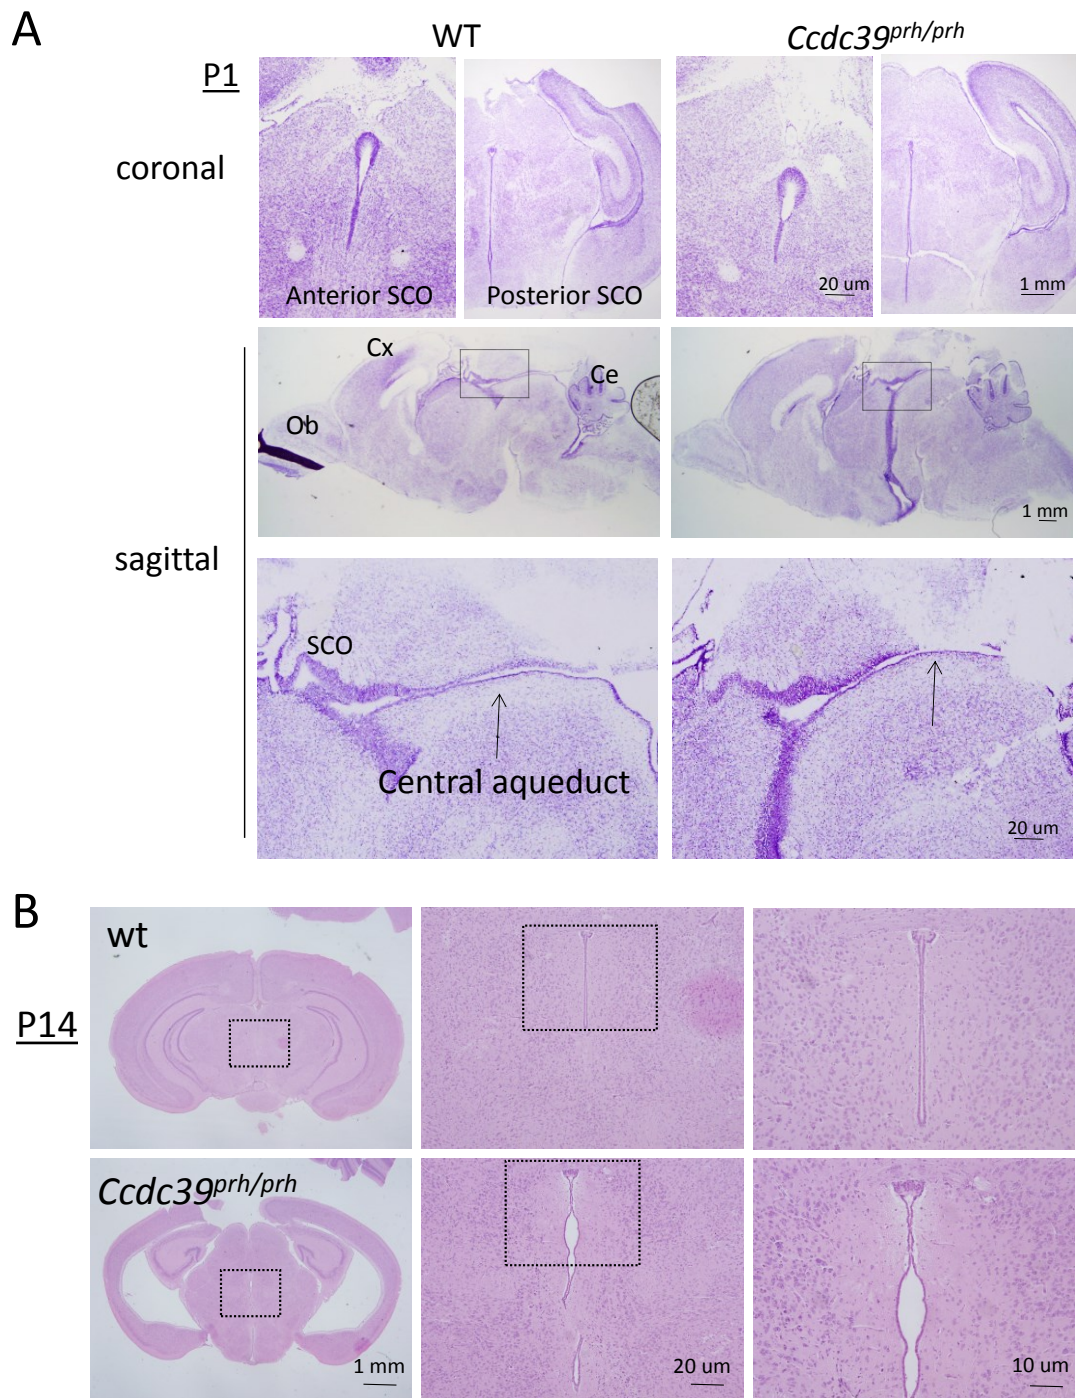

**Supplemental Figure 8. Physical obstruction of the central aqueduct was not found in early postnatal *Ccdc39<sup>prh/prh</sup>* mutants.**

- (A) Representative images of serial brain sections of P1 wild-type and *Ccdc39<sup>prh/prh</sup>* mutant mice in the Nissl staining. Note that there is normal opening of the central aqueduct (arrow) and SCO in the mutant at P1 when they have ventriculomegaly phenotype.
- (B) Hematoxylin and eosin staining of P14 wild-type and *Ccdc39<sup>prh/prh</sup>* mutant brain sections. The mutant mice developed abnormally lined ependymal cell layers that led to a wider opening in the rostral part of the central aqueduct.
